# Supplementary material for: Designing thermoreversible gels for extended release of mosquito repellent
Source: Royal Society of Chemistry journal article supplement (doi:10.1039/d4tb01384k), 2024-01-01
Supplement: d4tb01384k1.pdf [file d4tb01384k1.pdf]

Supporting Information

Designing Thermoreversible Gels for Extended Release of Mosquito Repellent

Javier Jimenez<sup>†</sup>, James Cilek, Sierra M. Schluep, Jeffrey G. Lundin<sup>\*</sup>

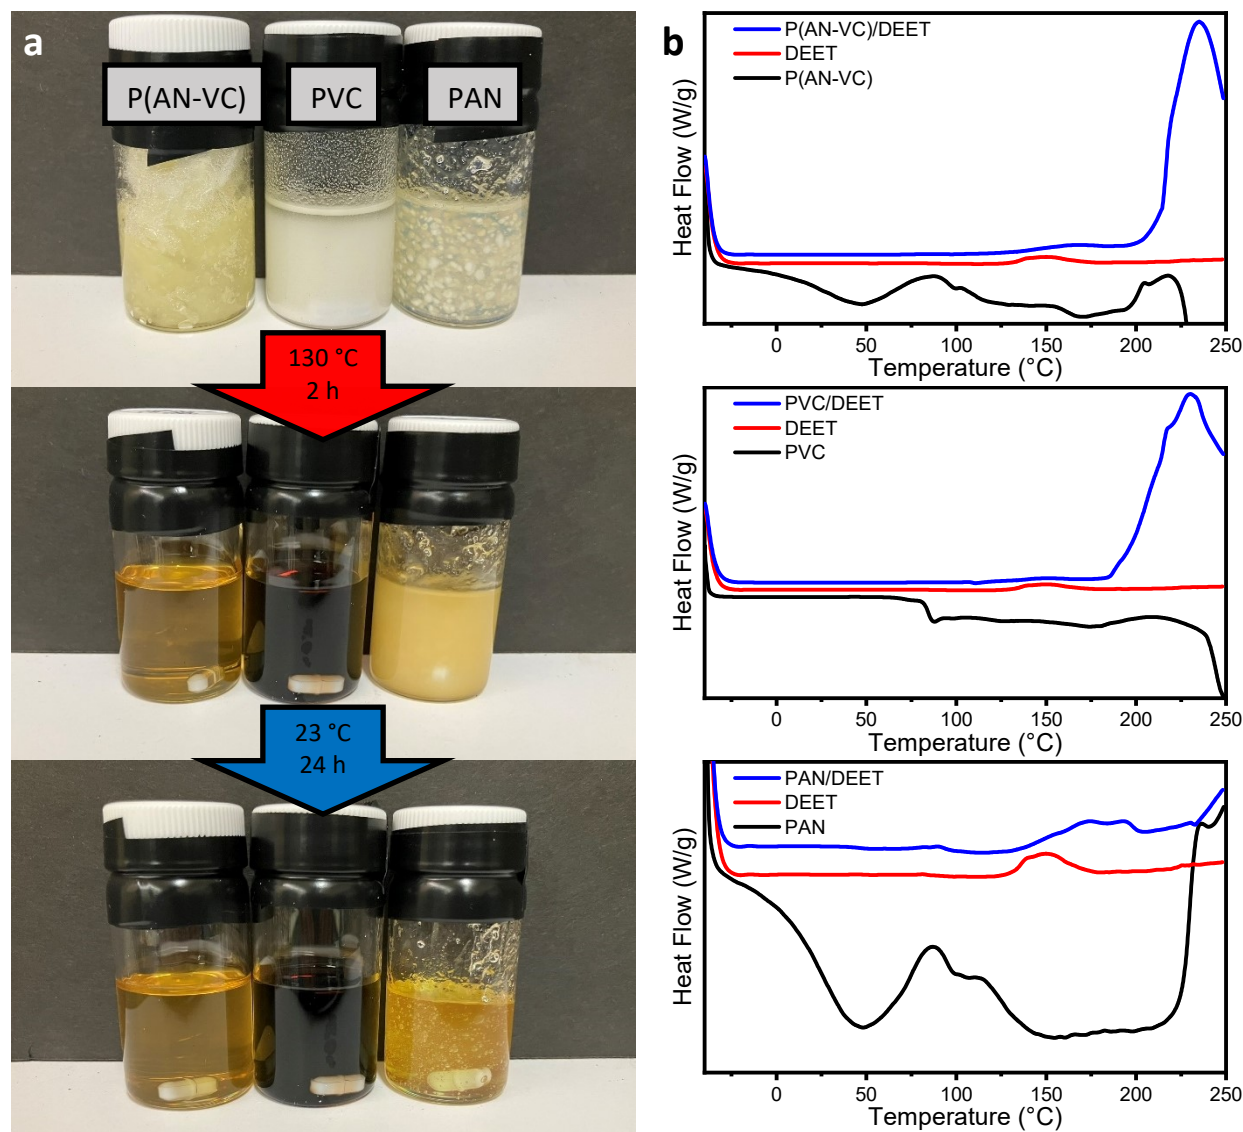

**Figure S1. Determination of polymer/DEET miscibility.** (a) P(AN-VC), PVC, and PAN in DEET at 20 g dL<sup>-1</sup> mixed in room temperature, heated and stirred at 130 °C for 2 h, and cooled to 23 °C for 24 h. (b) DSC assessment of neat polymer and polymer/DEET composites after 130 °C and mixing for 2 h.

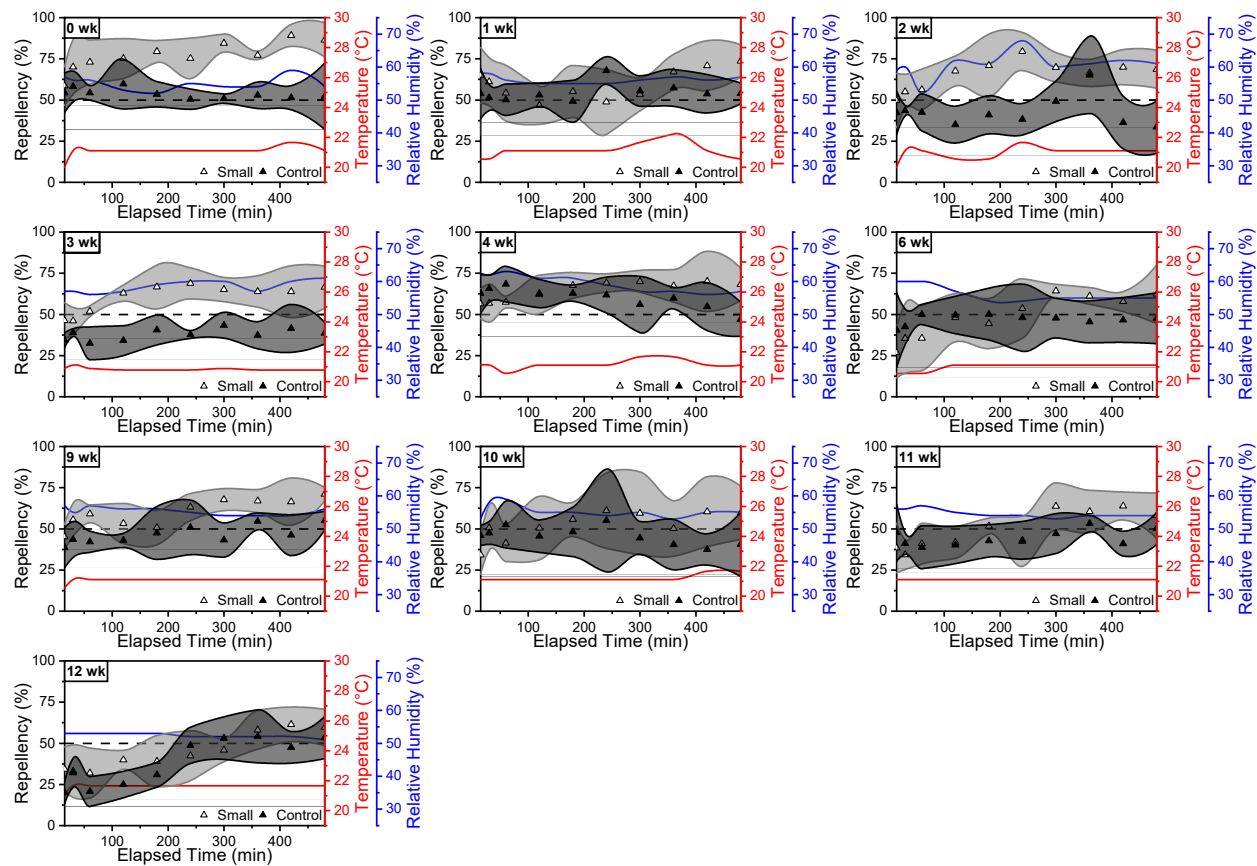

Figure S2. Repellency of small P(AN-VC)/DEET gel films.

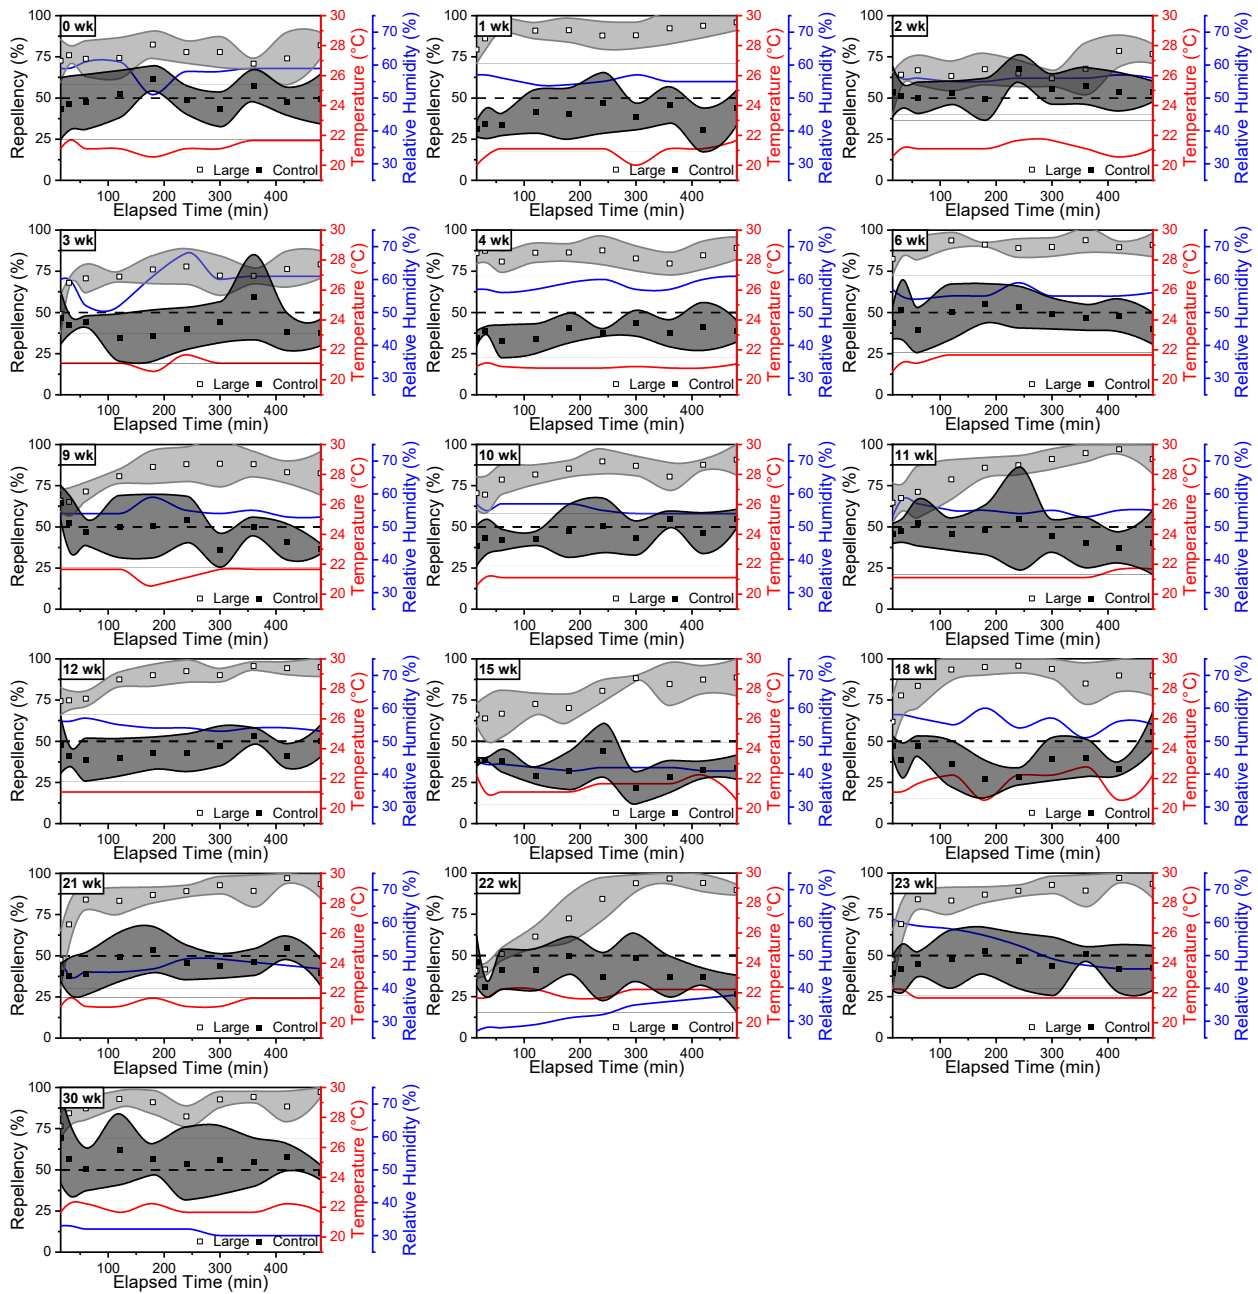

Figure S3. Repellency of large P(AN-VC)/DEET gel films.
